# Supplementary material for: Evidence of monolayer formation via diazonium grafting with a radical scavenger: electrochemical, AFM and XPS monitoring
Source: Royal Society of Chemistry journal article supplement (doi:10.1039/c5cp01401h), 2015-01-01
Supplement: c5cp01401h1.pdf [file c5cp01401h1.pdf]

Supporting information for:

Evidence of monolayer formation from diazonium grafting with radical scavenger: AFM and XPS monitoring.

*Thibaud Menanteau, † Eric Levillain, † Alison J. Downard‡ and Tony Breton\*†*

†MOLTECH-Anjou, Université d'Angers, UMR CNRS 6200, 2 Boulevard Lavoisier, 49045

Angers, France

‡MacDiarmid Institute for Advanced Materials and Nanotechnology, Department of Chemistry,

University of Canterbury, Private Bag 4800, Christchurch 8140, New Zealand

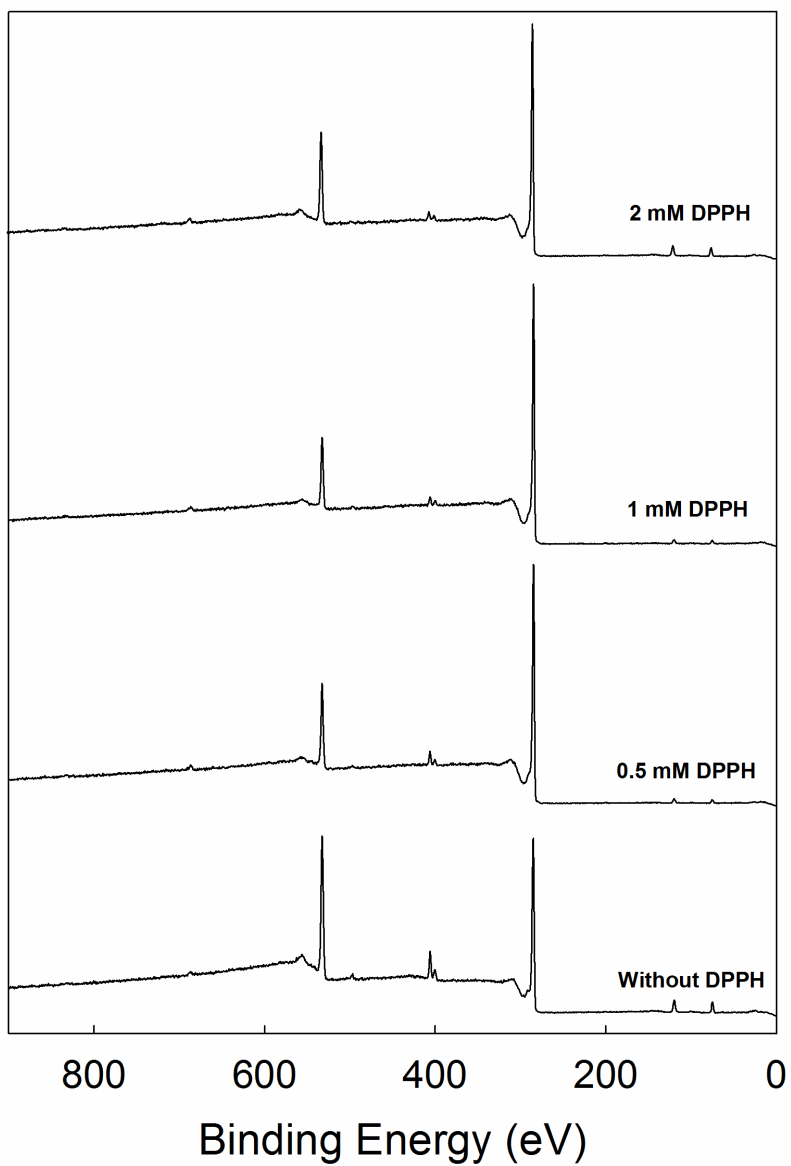

Figure S1: XPS survey spectra of glassy carbon modified with NBD without and with increasing DPPH concentrations.

Table S1. Atomic composition of the glassy carbon surface modified by electrochemical reduction of 4-nitrobenzenediazonium salt without and with DPPH.

| grafting conditions        | C 1s  | O 1s  | N1 s 406 eV | N 1s 400 eV | N / C |
|----------------------------|-------|-------|-------------|-------------|-------|
| bare                       | 91.2  | 9.4   |             | 0.4         |       |
| NBD (1 mM)                 | 69.75 | 23.07 | 5.38        | 1.8         | 0.122 |
| NBD (1 mM) + (0.5 mM) DPPH | 84.38 | 12.34 | 2.38        | 0.91        | 0.046 |
| NBD (1 mM) + (1 mM) DPPH   | 87.46 | 10.29 | 1.55        | 0.71        | 0.031 |
| NBD (1 mM) + (2 mM) DPPH   | 83.63 | 14.02 | 1.56        | 0.79        | 0.033 |

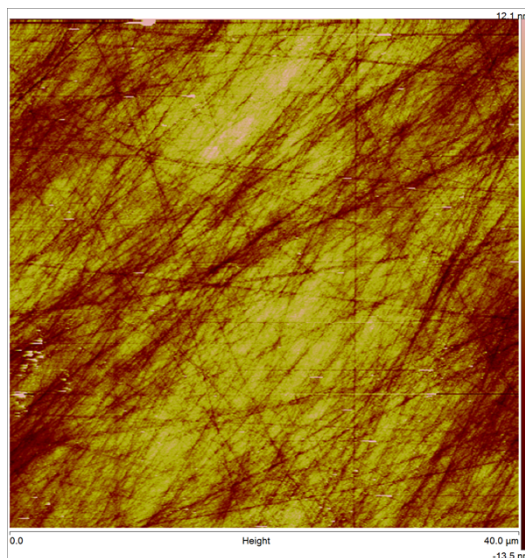

Figure S2. AFM image of a polished glassy carbon surface.

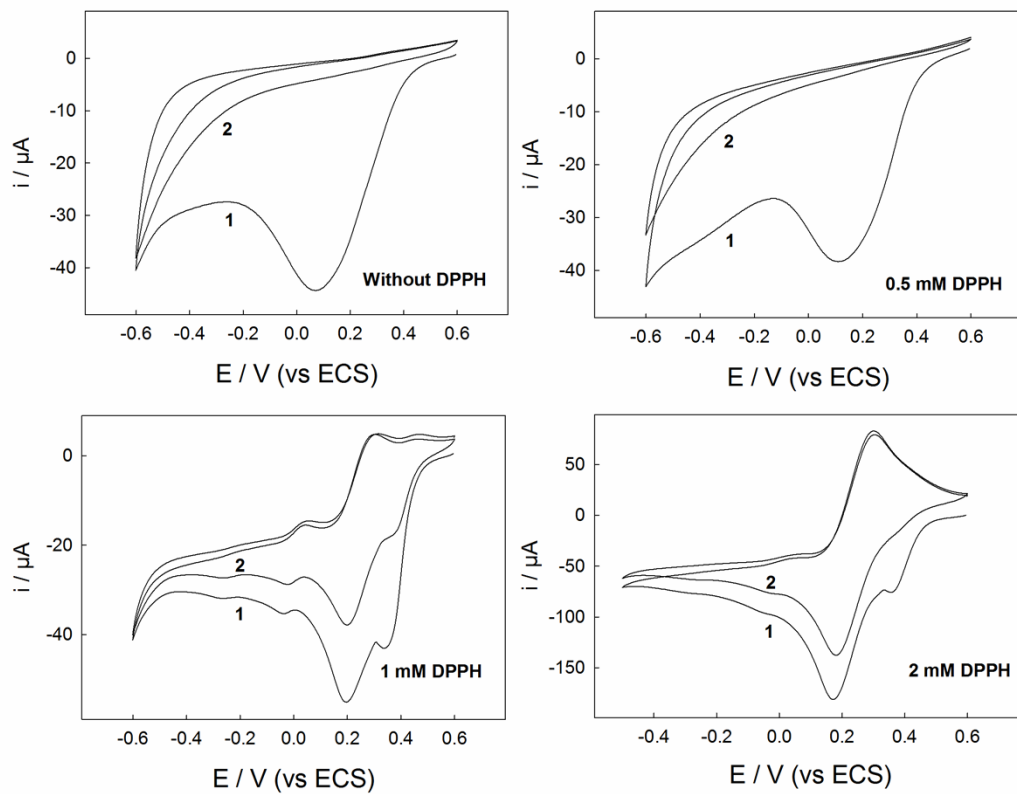

Figure S3. First and second CV cycle recorded in  $\text{CH}_3\text{CN}$   $0.1 \text{ nBu}_4\text{NPF}_6$  containing  $1 \text{ mM}$  of 4-nitrobenzenediazonium on a PPF electrode at  $50 \text{ mV/s}$  without and with increasing DPPH concentrations.

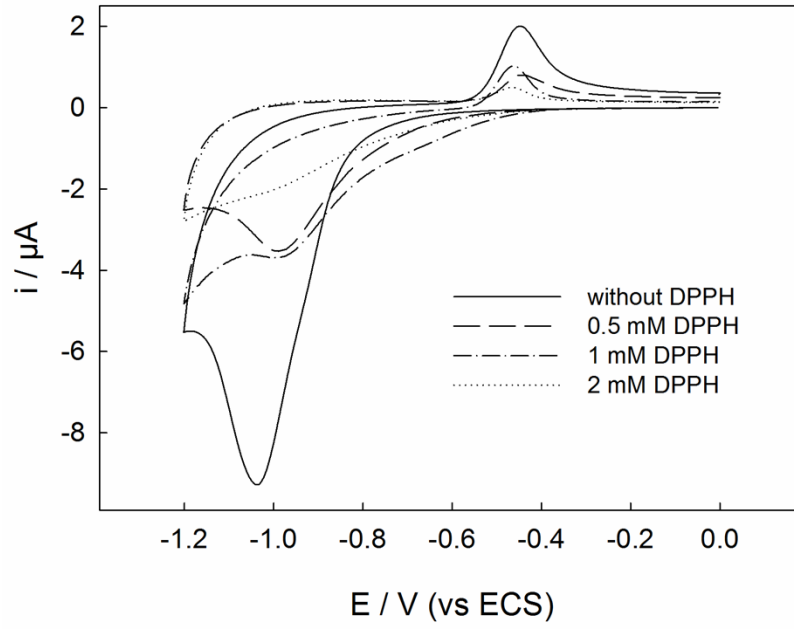

Figure S4. CVs (first cycle) recorded in aqueous 0.1M KOH on modified PPF electrode at 50 mV/s.
